# Supplementary material for: Sleep and energy drink consumption among Norwegian adolescents – a cross-sectional study
Source: Springer Nature journal article supplement (doi:10.1186/s12889-022-12972-w), 2022-03-18

Figure S1: Flowchart

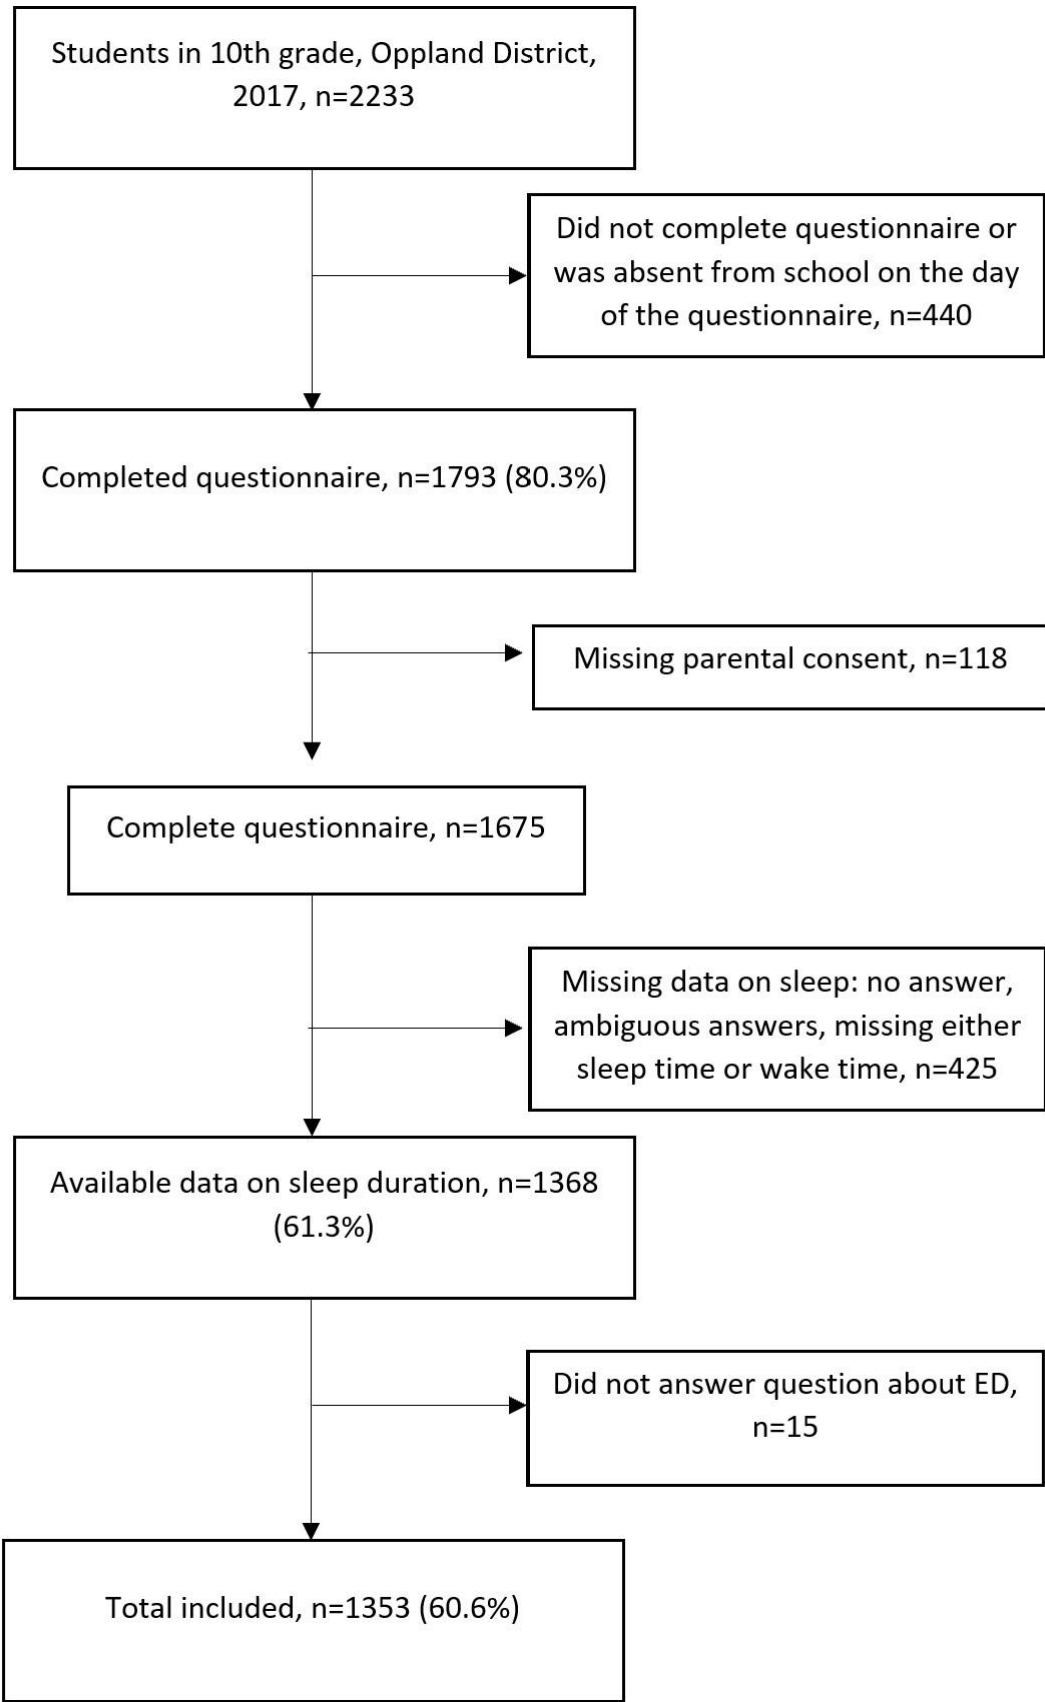

Supplement: MOESM1 [file 20232970]
